# Supplementary material for: Effects of Probiotics Administration on Human Metabolic Phenotype
Source: PubMed Central journal article supplement (PMC7601401; doi:10.3390/metabo10100396), 2020-10-07
Supplement: metabolites-10-00396-s001.pdf [file metabolites-10-00396-s001.pdf]

Supporting Material

# Effects of Probiotics Administration on Human Metabolic Phenotype

**Veronica Ghini<sup>1</sup>, Leonardo Tenori<sup>2,3</sup>, Marco Pane<sup>4</sup>, Angela Amoruso<sup>4</sup>, Giada Marroncini<sup>5</sup>, Diletta Francesca Squarzanti<sup>6,7</sup>, Barbara Azzimonti<sup>6,7</sup>, Roberta Rolla<sup>6,8</sup>, Paola Savoia<sup>6,9</sup>, Mirko Tarocchi<sup>5</sup>, Andrea Galli<sup>5</sup>, Claudio Luchinat<sup>\*1,2,3</sup>.**

<sup>1</sup> Consorzio Interuniversitario Risonanze Magnetiche di Metallo Proteine (CIRMMP), Sesto Fiorentino, Italy.

<sup>2</sup> Magnetic Resonance Center (CERM), University of Florence, Sesto Fiorentino, Italy.

<sup>3</sup> Department of Chemistry, University of Florence, Sesto Fiorentino, Italy.

<sup>4</sup> Probiotical S.p.A., Novara, Italy.

<sup>5</sup> Department of Experimental and Clinical Biochemical Sciences “Mario Serio”, University of Florence, Firenze, Italy.

<sup>6</sup> Department of Health Sciences (DiSS), University of Piemonte Orientale (UPO), Via Solaroli 17, 28100 Novara, Italy.

<sup>7</sup> Center for Translational Research on Autoimmune and Allergic Diseases (CAAD), DiSS, UPO, Corso Trieste 15/A, 28100 Novara, Italy.

<sup>8</sup> Clinical Chemistry Unit, Azienda Ospedaliero Universitaria Maggiore della Carità, Corso Mazzini 18, 28100, Novara, Italy

<sup>9</sup> SCDU Dermatology, AOU Maggiore della Carità, Novara, Italy.

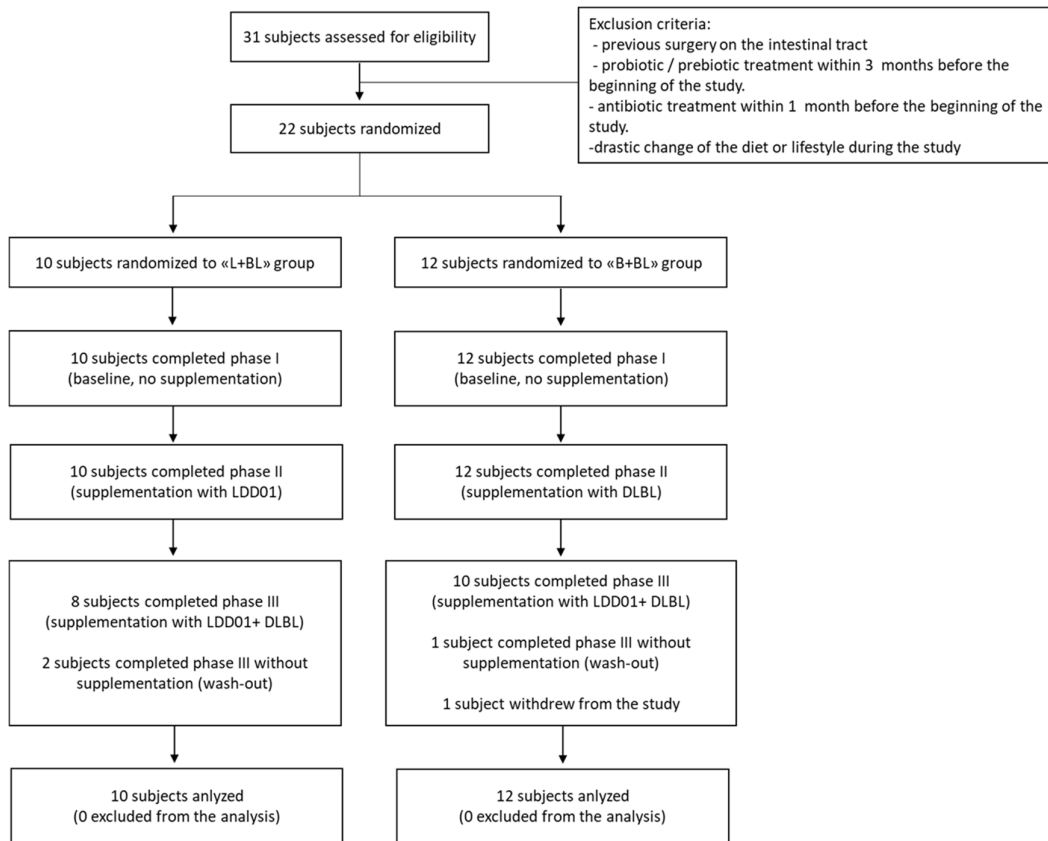

**Figure S1.** Participation Flowchart.
